# Supplementary material
Source: PubMed Central journal article supplement (PMC4142249)
Supplement: mmc1.pdf [file mmc1.pdf]

# Single-Molecule Tracking of Inositol Trisphosphate Receptors Reveals Different Motilities and Distributions

Ian F. Smith,<sup>1,\*</sup> Divya Swaminathan,<sup>1</sup> George D. Dickinson,<sup>1</sup> and Ian Parker<sup>1,2</sup>

<sup>1</sup>Department of Neurobiology and Behavior and <sup>2</sup>Department of Physiology and Biophysics, University of California, Irvine, Irvine, California

## Supplemental Material

Movie S1: Random Motility of IP<sub>3</sub>R Molecules in the ER of a COS7 Cell

The ER network was visualized by autofluorescence, and an average of 100 frames is shown in green. Red dots indicate individual red-converted mEos2-IP<sub>3</sub>R1 molecules.
